# Supplementary material for: Description and analysis of representative COVID-19 cases–A retrospective cohort study
Source: PubMed Central journal article supplement (PMC8323911; doi:10.1371/journal.pone.0255513), 2021-07-30
Supplement: pone.0255513.s001.pdf [file pone.0255513.s001.pdf]

**S1 Table: Data comparison of study population vs. overall infected population**

|    | Age groups | n overall | % of overall population | n study population | % of study population | p-value | significance                |
|----|------------|-----------|-------------------------|--------------------|-----------------------|---------|-----------------------------|
| 1  | 0          | 9         | 0.7                     | 0                  | 0                     | 31      | *                           |
| 2  | 10         | 25        | 1.9                     | 9                  | 1                     | 126     | not significantly different |
| 3  | 20         | 155       | 11.9                    | 99                 | 11                    | 0.59    | not significantly different |
| 4  | 30         | 217       | 16.6                    | 147                | 16.4                  | 0.9276  | not significantly different |
| 5  | 40         | 201       | 15.4                    | 156                | 17.4                  | 0.2358  | not significantly different |
| 6  | 50         | 244       | 18.7                    | 177                | 19.7                  | 0.5811  | not significantly different |
| 7  | 60         | 215       | 16.5                    | 175                | 19.5                  | 0.07577 | not significantly different |
| 8  | 70         | 92        | 7                       | 68                 | 7.6                   | 0.6979  | not significantly different |
| 9  | 80         | 109       | 8.4                     | 52                 | 5.8                   | 0.02926 | *                           |
| 10 | 90         | 27        | 2.1                     | 10                 | 1.1                   | 0.1229  | not significantly different |
| 11 | 100        | 11        | 0.8                     | 2                  | 0.2                   | 0.1135  | not significantly different |
| 12 | missing    | 0         | 0                       | 2                  | 0.2                   | 0.3238  | not significantly different |

To assess the representativeness of our study population in comparison with the overall population infected with SARS-CoV-2, we compared the age groups sorted by age groups using the Chi-Square test.
