# Supplementary material for: Description and analysis of representative COVID-19 cases–A retrospective cohort study
Source: PubMed Central journal article supplement (PMC8323911; doi:10.1371/journal.pone.0255513), 2021-07-30
Supplement: pone.0255513.s002.pdf [file pone.0255513.s002.pdf]

**S2 Table: Initial and subsequent symptoms**

|                          | All patients | Asymptomatic patients | Mild (symptomatic outpatients) | Moderate (hospitalized) | Critical (ventilation) | Deceased  |
|--------------------------|--------------|-----------------------|--------------------------------|-------------------------|------------------------|-----------|
| n (%)                    | 897 (100)    | 54 (6.0)              | 713 (79.5)                     | 97 (10.8)               | 16 (1.8)               | 17 (1.9)  |
| Initial symptoms n (%)   |              | Asymptomatic          |                                |                         |                        |           |
| 1. Fever                 | 347 (38.7)   |                       | 264 (37.0)                     | 60 (61.9)               | 11 (68.8)              | 12 (70.6) |
| 2. Cough                 | 375 (41.8)   |                       | 301 (42.2)                     | 54 (55.7)               | 7 (43.8)               | 13 (76.5) |
| 3. Sputum                | 38 (4.2)     |                       | 30 (4.2)                       | 6 (6.2)                 | 1 (6.3)                | 1 (5.9)   |
| 4. Sore throat           | 229 (25.5)   |                       | 203 (28.5)                     | 23 (23.7)               | 3 (18.8)               | 1 (5.9)   |
| 5. Dyspnea               | 81 (9.0)     |                       | 44 (6.2)                       | 26 (26.8)               | 4 (25.0)               | 7 (41.2)  |
| 6. Muscle pain           | 189 (21.1)   |                       | 163 (22.9)                     | 19 (19.6)               | 5 (31.3)               | 2 (11.8)  |
| 7. Limb pain             | 316 (35.2)   |                       | 270 (38.9)                     | 37 (38.1)               | 7 (43.8)               | 2 (11.8)  |
| 8. Fatigue               | 402 (44.8)   |                       | 357 (50.1)                     | 48 (49.5)               | 9 (56.3)               | 10 (58.8) |
| 9. Headache              | 368 (41.0)   |                       | 323 (45.3)                     | 38 (39.2)               | 5 (31.3)               | 2 (11.8)  |
| 10. Runny nose           | 173 (19.3)   |                       | 160 (22.4)                     | 11 (11.3)               | 2 (12.5)               | 0 (0.0)   |
| 11. Chest pain           | 80 (8.9)     |                       | 68 (9.5)                       | 9 (9.3)                 | 1 (6.3)                | 2 (11.8)  |
| 12. Diarrhea             | 113 (12.6)   |                       | 93 (13.0)                      | 13 (13.4)               | 3 (18.8)               | 4 (23.5)  |
| 13. Nausea               | 52 (5.8)     |                       | 39 (5.5)                       | 9 (9.3)                 | 2 (12.5)               | 2 (11.8)  |
| 14. Change in taste      | 239 (26.6)   |                       | 209 (29.3)                     | 26 (26.8)               | 3 (18.8)               | 1 (5.9)   |
| 15. Other                | 166 (18.5)   | 132 (18.5)            | 12 (12.4)                      | 3 (18.8)                | 0 (0.0)                |           |
| Developed symptoms n (%) |              | Asymptomatic          |                                |                         |                        |           |
| 1. Fever                 | 134 (14.9)   |                       | 110 (15.4)                     | 22 (22.7)               | 2 (12.5)               | 0 (0.0)   |
| 2. Cough                 | 177 (19.7)   |                       | 156 (21.9)                     | 18 (18.6)               | 2 (12.5)               | 1 (5.9)   |
| 3. Sputum                | 41 (4.6)     |                       | 35 (4.9)                       | 4 (4.1)                 | 2 (12.5)               | 0 (0.0)   |
| 4. Sore throat           | 77 (8.6)     |                       | 66 (9.3)                       | 9 (9.3)                 | 2 (12.5)               | 0 (0.0)   |
| 5. Dyspnea               | 100 (11.1)   |                       | 69 (9.7)                       | 24 (24.7)               | 6 (37.5)               | 1 (5.9)   |
| 6. Muscle pain           | 90 (10.0)    |                       | 79 (11.1)                      | 8 (8.3)                 | 3 (18.8)               | 0 (0.0)   |
| 7. Limb pain             | 116 (12.9)   |                       | 103 (14.5)                     | 10 (10.3)               | 3 (18.8)               | 0 (0.0)   |
| 8. Fatigue               | 184 (20.5)   |                       | 167 (23.4)                     | 16 (16.5)               | 0 (0.0)                | 1 (5.9)   |
| 9. Headache              | 145 (16.2)   |                       | 127 (17.8)                     | 15 (15.5)               | 3 (18.8)               | 0 (0.0)   |
| 10. Runny nose           | 97 (10.8)    |                       | 93 (13.0)                      | 4 (4.1)                 | 0 (0.0)                | 0 (0.0)   |
| 11. Chest pain           | 74 (8.2)     |                       | 67 (9.4)                       | 6 (6.2)                 | 1 (6.3)                | 0 (0.0)   |
| 12. Diarrhea             | 99 (11.0)    |                       | 80 (11.2)                      | 16 (16.5)               | 2 (12.5)               | 1 (5.9)   |
| 13. Nausea               | 44 (4.9)     |                       | 38 (5.3)                       | 5 (5.2)                 | 1 (6.3)                | 0 (0.0)   |
| 14. Change in taste      | 298 (33.2)   |                       | 271 (38.0)                     | 24 (24.7)               | 3 (18.8)               | 0 (0.0)   |
| 15. Other                | 138 (15.4)   | 127 (17.8)            | 8 (8.3)                        | 1 (6.3)                 | 2 (11.8)               |           |
