# Supplementary material for: Description and analysis of representative COVID-19 cases–A retrospective cohort study
Source: PubMed Central journal article supplement (PMC8323911; doi:10.1371/journal.pone.0255513), 2021-07-30
Supplement: pone.0255513.s003.pdf [file pone.0255513.s003.pdf]

**S3 Table: Cox regression, Influence of variables on time to hospitalization**

| Variables                                                                                             | HR   | 95% Cis   | p-value |
|-------------------------------------------------------------------------------------------------------|------|-----------|---------|
| Age                                                                                                   | 1.05 | 1.03-1.06 | <0.0001 |
| Sex<br>Female                                                                                         | 0.59 | 0.41-0.85 | 0.005   |
| Lung disease incl.<br>- Any lung disease<br>- Chronic Asthma<br>with medication<br>- Any lung surgery | 1.09 | 0.72-1.64 | 0.688   |
| Smoking history (py)                                                                                  | 1.00 | 0.99-1.02 | 0.801   |
| Coronary heart disease                                                                                | 1.45 | 0.70-3.00 | 0.313   |
| Hypertension                                                                                          | 1.09 | 0.70-1.68 | 0.702   |
| Diabetes mellitus (Type<br>1 and 2)                                                                   | 1.39 | 0.77-2.50 | 0.273   |

Multivariable Cox proportional hazard model analyzing age, sex, comorbidities and smoking history (in pack years). n=897
