# Supplementary material for: Description and analysis of representative COVID-19 cases–A retrospective cohort study
Source: PubMed Central journal article supplement (PMC8323911; doi:10.1371/journal.pone.0255513), 2021-07-30
Supplement: pone.0255513.s005.pdf [file pone.0255513.s005.pdf]

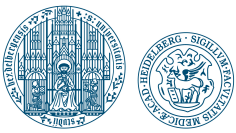

## COVID-19 Fragebogen

Bitte beantworten Sie die unten stehenden Fragen.

Die Umfrage wird voraussichtlich 10-15 Minuten dauern. Die Umfrage dient dazu, den Diagnoseprozess und die Erkrankung und damit verbundene Faktoren Ihrer SARS-CoV-2 (neuartiges Coronavirus) Infektion zu verstehen. Mit Ihren Antworten helfen Sie medizinischen Einrichtungen, entsprechende Maßnahmen zu planen, sodass Patienten eine bessere medizinische Versorgung erhalten können. Jede Frage kann übersprungen oder ausgelassen werden.

### Allgemeine Fragen

Wie lautet Ihre Studien-ID?

*Sie finden die Studien-ID auf dem  
Anschreiben links unten. (z. B. HD-S-586)*

\_\_\_\_\_

Wie lautet die Postleitzahl Ihres Wohnortes ?

\_\_\_\_\_

Wie lautet Ihr Geburtsmonat?

(Bitte geben Sie eine Zahl zwischen 1 und 12 an)

Wie lautet Ihr Geburtsjahr ?

(Bitte schreiben Sie Ihr Geburtsjahr im Format  
1950)

Ihr Geschlecht ?

- Männlich  
 Weiblich  
 Divers

Wie groß sind Sie ? (in cm)

\_\_\_\_\_

Wieviel Kilogramm wiegen Sie ?

\_\_\_\_\_

Wie ist Ihre Wohnsituation ?

- Allein  
 in Partnerschaft  
 Sonstiges

Anzahl Personen im Haushalt ?

\_\_\_\_\_

Davon Anzahl Personen unter 18 Jahren ?

\_\_\_\_\_

---

Hatten Sie während Ihrer COVID-19 Infektion Symptome?

- Ja  
 Nein
- 

*Falls ja:* Frühestes Auftreten der Symptome während Ihrer COVID-19 Infektion ?

\_\_\_\_\_ (TT-MM-JJJJ)

---

*Falls ja:* Erste Symptome, seit Sie mit COVID-19 infiziert waren (mehrere Möglich) ?

- Erhöhte Temperatur / Fieber
  - Husten
  - Auswurf
  - Halsschmerzen
  - Blutiges Abhusten
  - Atemnot
  - Muskelschmerzen
  - Gliederschmerzen
  - Müdigkeit
  - Kopfschmerzen
  - Laufende Nase
  - Schmerzen in der Brust
  - Durchfall
  - Übelkeit / Erbrechen
  - Veränderung des Geschmacks
  - Sonstiges
- 

*Bei erhöhter Temperatur/Fieber:* Was war Ihre höchste Körpertemperatur seit Ihrer Infektion ?

\_\_\_\_\_

---

Wenn Sonstiges, was ?

\_\_\_\_\_

---

Haben sich Ihre Symptome im Verlauf der Erkrankung verschlechtert ?

- Ja  
 Nein
- 

*Falls ja:* An welchem Datum haben sich Ihre Symptome verschlechtert ?

\_\_\_\_\_ (TT-MM-JJJJ)

---

Haben sich Ihre Symptome im Verlauf verändert ?

- Ja  
 Nein
- 

*Falls ja:* Welche Symptomatik ist neu hinzugekommen ?

- Erhöhte Temperatur / Fieber
- Husten
- Auswurf
- Halsschmerzen
- Blutiges Abhusten
- Atemnot
- Muskelschmerzen
- Gliederschmerzen
- Müdigkeit
- Kopfschmerzen
- Laufende Nase
- Schmerzen in der Brust
- Durchfall
- Übelkeit / Erbrechen
- Veränderung des Geschmacks
- Sonstiges

---

*Bei erhöhter Temperatur/Fieber:*  
Was war Ihre höchste Körpertemperatur? \_\_\_\_\_

---

Wenn Sonstiges, was ? \_\_\_\_\_

---

An welchem Datum wurde Ihre COVID-19 Diagnose bestätigt (positives Testergebnis) ? \_\_\_\_\_

(TT-MM-JJJJ)

---

Wo wurden Sie getestet ?

- Universitätsklinikum
- Drive-In Klinik
- Externe Testklinik
- Mobile Teststation
- Praxis

---

*Falls "Externe Testklinik":*  
In welcher externen Testklinik ? \_\_\_\_\_

---

War ein Test vorab negativ ?

- Ja
- Nein

---

*Falls ja:* An welchem Datum war ein Test vorab negativ ? \_\_\_\_\_

(TT-MM-JJJJ)

---

Ist Isolierung bereits aus eigener Initiative erfolgt ?

- Ja
- Nein

---

*Falls ja:* Ab wann ? \_\_\_\_\_

(TT-MM-JJJJ)

---

Geschätzte Anzahl der Kontaktpersonen von Beginn der Symptome bis zur Isolation ? (inklusive Personen im Haushalt) \_\_\_\_\_

---

Wo waren Sie in Isolation, nachdem die Diagnose gestellt wurde ?

- Zuhause
- Krankenhaus
- Anderer Ort

---

*Falls "Anderer Ort":* Welcher ? \_\_\_\_\_

---

Wo vermuten Sie, sich mit COVID-19 infiziert zu haben ?

- Weiß nicht / nicht sicher
- Sozialkontakt
- Arbeitskontakt
- Kontakt in Universität / Schule / Kindergarten von Ihnen oder einem Kind in der Familie
- Reise in Risikogebiet
- Sonstige

---

*Falls "Reise in Risikogebiet":*  
Welches Risikogebiet ? \_\_\_\_\_

---

*Falls "Sonstige":* Bitte beschreiben: \_\_\_\_\_

---

Wie krank waren Sie, als die Diagnose gestellt wurde ?

- Normale uneingeschränkte Aktivität wie vor der Erkrankung.
- Einschränkung bei körperlicher Anstrengung, aber gehfähig; leichte körperliche Arbeit bzw. Arbeit im Sitzen (z.B. leichte Hausarbeit oder Büroarbeit) möglich.
- Gehfähig, Selbstversorgung möglich, aber nicht arbeitsfähig; kann mehr als 50% der Wachzeit aufstehen.
- Nur begrenzte Selbstversorgung möglich; 50% oder mehr der Wachzeit an Bett oder Stuhl gebunden.
- Völlig pflegebedürftig, keinerlei Selbstversorgung möglich; völlig an Bett oder Stuhl gebunden.

---

Waren Sie stationär im Krankenhaus ?

- Ja
- Nein

---

*Falls ja:* Ab wann waren Sie stationär im Krankenhaus ? (Datum)

\_\_\_\_\_ (TT-MM-JJJJ)

---

*Falls ja:* Für wie viele Tage waren Sie stationär im Krankenhaus ?

\_\_\_\_\_

---

*Falls ja:* Waren Sie auf der Intensivstation ?

- Ja
- Nein

---

*Falls ja:* Mussten Sie künstlich beatmet werden ?

- Ja
- Nein

---

*Falls Sie Symptome hatten:*  
Wann sind Ihre Symptome verschwunden ? (Datum)

\_\_\_\_\_ (TT-MM-JJJJ)

---

Wurde zum Ende der Quarantäne ein Kontrollabstrich vorgenommen, der **negativ** war ?

- Ja
- Nein

---

*Falls ja:* Wann wurde der negative Kontrollabstrich zum Ende der Quarantäne vorgenommen ? (Datum)

\_\_\_\_\_ (TT-MM-JJJJ)

---

Wurde zum Ende der Quarantäne ein Kontrollabstrich vorgenommen, der **positiv** war ?

- Ja
- Nein

---

*Falls ja:* Wann wurde der positive Kontrollabstrich zum Ende der Quarantäne vorgenommen ? (Datum)  
*Bei mehreren positiven Kontrollabstrichen: Datum des letzten positiven Abstrichs*

\_\_\_\_\_ (TT-MM-JJJJ)

---

Wo sind Sie jetzt ?

- Aus der Isolation entlassen
- Noch im Krankenhaus

---

Heutiges Datum / Datum der Befragung

\_\_\_\_\_ (TT-MM-JJJJ)

Welche der folgenden Erkrankung(en) der Lunge haben Sie ? (mehrere möglich)

- Asthma bronchiale
- Chronisch obstruktive Lungenerkrankung (COPD)
- Atemstörungen im Schlaf
- Obstruktives Schlafapnoesyndrom (OSAS)
- Interstitielle Lungenerkrankung (Erkrankungen des Lungengerüsts)
- Lungenkrebs
- Andere
- Keine

*Falls "Andere":*  
Welche andere/n Erkrankung/en der Lunge haben Sie ? \_\_\_\_\_

Sind Sie schon einmal an der Lunge operiert worden?

- Ja
- Nein

Haben Sie eine Erkrankung/en des Herz-/Kreislaufsystems ? (z. B. Bluthochdruck oder Gefäßverkalkung)

- Ja
- Nein

*Falls ja:* Welche Erkrankung/en des Herz-/Kreislaufsystems haben Sie ?

- Erkrankung der Herzkranzgefäße
- Herzrhythmusstörungen
- Herzversagen/Herzinsuffizienz
- Schlaganfall
- Bluthochdruck (Hypertonie)
- Periphere arterielle Verschlusskrankheit (arterielle Durchblutungsstörung der Beine)
- Andere

Haben Sie eine Erkrankung/en der Niere ?

- Ja
- Nein

*Falls ja:* Welche Erkrankung/en der Niere haben Sie ?

- Chronisches Nierenversagen mit Dialyse
- Chronisches Nierenversagen ohne Dialyse
- Erfolgte Nierentransplantation
- Andere

Haben Sie eine Erkrankung/en der Leber?

- Ja
- Nein

*Falls ja:* Welche Erkrankung/en der Leber haben Sie ?

- Fettleber (Nicht-alkoholische Fettleber, NASH)
- Zirrhose
- Erfolgte Lebertransplantation
- Andere

## Weitere Erkrankungen

|                                                                 | Ja                    | Nein                  |
|-----------------------------------------------------------------|-----------------------|-----------------------|
| Haben Sie Diabetes mellitus?                                    | <input type="radio"/> | <input type="radio"/> |
| Haben Sie eine Autoimmunerkrankung?                             | <input type="radio"/> | <input type="radio"/> |
| Sind Sie mit HIV infiziert?                                     | <input type="radio"/> | <input type="radio"/> |
| Haben oder hatten Sie eine Krebserkrankung (außer Lungenkrebs)? | <input type="radio"/> | <input type="radio"/> |
| Haben Sie weitere Erkrankung/en?                                | <input type="radio"/> | <input type="radio"/> |

Falls Sie Diabetes mellitus haben:  
Spritzen Sie regelmäßig Insulin ?

- Ja  
 Nein

Falls Sie eine Autoimmunerkrankung haben:  
Welche Autoimmunerkrankung haben Sie?

- Rheumatoide Arthritis (Rheuma)  
 Multiple Sklerose  
 Andere

Falls "Andere":  
Welche andere Autoimmunerkrankung/en haben Sie ?

\_\_\_\_\_

Falls Sie weitere Erkrankung/en haben:  
Welche weitere/n Erkrankung/en haben Sie ?

\_\_\_\_\_  
(Bei mehreren Erkrankungen bitte eine neue Zeile verwenden)

Haben Sie vor dem Beginn der Symptome regelmäßig Medikamente eingenommen ?

- Ja  
 Nein

---

Falls ja: Welche Medikamente haben Sie vor dem Beginn der Symptome regelmäßig eingenommen ?

Bitte geben Sie ein Medikamenten-/Präparatname pro Zeile an und geben Sie an, wann/wie oft Sie das Medikament nehmen im Stil morgens-mittags-abends-nachts.

Eine 0 steht für "Medikament zu dieser Zeit nicht genommen",  
eine 1 steht dafür für "Medikament in der angegebenen Dosis zu dieser Zeit genommen",  
eine 2 steht für "Medikament in zweifacher Dosis zu dieser Zeit genommen".

---

---

---

---

---

---

---

Z. B. Nur morgens zwei Tabletten Pantoprazol (20mg) würde also als "Pantoprazol 20mg 2-0-0-0" geschrieben werden,  
Mittags und nachts eine Tablette ASS (100mg) als "ASS 100mg 0-1-0-1"

---

Sind Sie schwanger ?

- Ja  
 Nein

## Nehmen Sie eines der folgenden Medikamente?

|                                                                                                                                                                                                                                                                                                     | Ja                    | Nein                  | Weiß nicht            |
|-----------------------------------------------------------------------------------------------------------------------------------------------------------------------------------------------------------------------------------------------------------------------------------------------------|-----------------------|-----------------------|-----------------------|
| Nehmen Sie Medikamente ein mit einem Wirkstoff, der auf "-pril" endet? (z.B. Benazepril, Captopril, Cilazapril, Enalapril, Fosinopril, Imidapril, Lisinopril, Moexipril)                                                                                                                            | <input type="radio"/> | <input type="radio"/> | <input type="radio"/> |
| Nehmen Sie Medikamente ein mit einem Wirkstoff, der auf "-sartan" endet? (z. B. Azilsartan (Prodrug: Azilsartanmedoxomil), Candesartan, Eprosartan, Fimasartan, Irbesartan, Losartan, Milfasartan, Olmesartan, Pomisartan, Pratosartan, Ripisartan, Sapisartan, Tasosartan, Telmisartan, Valsartan) | <input type="radio"/> | <input type="radio"/> | <input type="radio"/> |
| Nehmen Sie Medikamente ein, die das Immunsystem schwächen? (z.B. "Cortison" oder Medikamente nach einer Transplantation)                                                                                                                                                                            | <input type="radio"/> | <input type="radio"/> | <input type="radio"/> |
| Nehmen Sie Medikamente gegen eine Autoimmunerkrankung ein?                                                                                                                                                                                                                                          | <input type="radio"/> | <input type="radio"/> | <input type="radio"/> |
| Erhalten Sie aktuell oder im vergangenen Monat eine Chemotherapie?                                                                                                                                                                                                                                  | <input type="radio"/> | <input type="radio"/> | <input type="radio"/> |
| Nehmen Sie regelmäßig antientzündliche Schmerzmittel (z.B. Ibuprofen, Paracetamol etc.) ein                                                                                                                                                                                                         | <input type="radio"/> | <input type="radio"/> | <input type="radio"/> |

*Falls Sie regelmäßig antientzündliche Schmerzmittel*

*nehmen: Seit wann nehmen Sie regelmäßig antientzündliche Schmerzmittel ein ?*

\_\_\_\_\_

Rauchen Sie ?

- Ja  
 Nein; nicht mehr  
 Nein; niemals

*Bei "Ja":*

Seit wie vielen Jahren rauchen Sie ?

\_\_\_\_\_

*Bei "Ja": Wie viele Zigaretten rauchen Sie durchschnittlich am Tag ?*

\_\_\_\_\_

*Bei "Nein; nicht mehr":*

Für wie viele Jahre haben Sie in etwa geraucht ?

\_\_\_\_\_

*Bei "Nein; nicht mehr": Wie viele Zigaretten haben Sie in diesem Zeitraum in etwa durchschnittlich pro Tag geraucht ?*

\_\_\_\_\_



**Wie oft fühlten Sie sich im Verlauf der LETZTEN 2 WOCHEN durch die folgenden Beschwerden beeinträchtigt ?**

|                                                         | Überhaupt nicht       | An einzelnen Tagen    | An mehr als der Hälfte der Tage | Beinahe jeden Tag     |
|---------------------------------------------------------|-----------------------|-----------------------|---------------------------------|-----------------------|
| Wenig Interesse oder Freude an Ihren Tätigkeiten        | <input type="radio"/> | <input type="radio"/> | <input type="radio"/>           | <input type="radio"/> |
| Niedergeschlagenheit, Schwermut oder Hoffnungslosigkeit | <input type="radio"/> | <input type="radio"/> | <input type="radio"/>           | <input type="radio"/> |

---

Wie war Ihre allgemeine Stimmung während Ihrer Isolation ?

- Schlecht
- Eher Schlecht
- Mittelmäßig
- Eher Gut
- Gut

---

Bevor COVID-19 bei Ihnen diagnostiziert wurde, wie haben Sie das Risiko einer Ansteckung mit COVID-19 für sich eingeschätzt ?

- Hoch
- Moderat/Mittel
- Minimal
- Nicht vorhanden

---

Wie ist Ihre berufliche Situation ?

- Selbstständig
- Angestellt (Vollzeit)
- Angestellt (Teilzeit)
- Im Ruhestand
- Arbeitslos
- Schüler
- Student
- in Ausbildung
- andere

---

Was sind die Auswirkungen von COVID-19 auf Ihre Arbeit ?

- Arbeit wie gewohnt
- Remote-Office-Arbeit (Home-Office)
- Krankenstand
- Kurzarbeit
- Urlaub
- Arbeit geschlossen während Ausbruch
- Entlassung
- Im Ruhestand / Keine Arbeit
- Keine Aufträge/Kunden (Selbstständig)
- Wiedereinstieg in Berufstätigkeit

---

Welche Informationsquelle/n nutzen sie, wenn Sie sich über Infektionskrankheiten wie COVID-19 informieren ?

- Twitter
- Facebook
- Wikipedia
- Robert-Koch-Institut
- Radio
- Fernsehen / TV
- Nachrichtenportale
- Zeitungen
- Bundesgesundheitsministerium
- medizinische (online) Fachliteratur
- andere Internetquellen
- Sonstige

---

Bei "Sonstige": Welche sonstige Informationsquelle/n nutzen sie, wenn Sie sich über Infektionskrankheiten wie COVID-19 informieren ?

---

---

Welcher/n Informationsquelle/n vertrauen Sie NICHT, wenn Sie sich über Infektionskrankheiten wie COVID-19 informieren ?

- Twitter
- Facebook
- Wikipedia
- Robert-Koch-Institut
- Radio
- Fernsehen / TV
- Nachrichtenportale
- Zeitungen
- Bundesgesundheitsministerium
- medizinische (online) Fachliteratur
- andere Internetquellen
- Sonstige

---

Bei "Sonstige": Welcher/n sonstige/n Informationsquelle/n trauen Sie nicht, wenn Sie sich über Infektionskrankheiten wie COVID-19 informieren ?

\_\_\_\_\_

---

**Wieviel hat Sie Ihre COVID-19 Erkrankung bisher gekostet (Schätzung, freiwillige Angaben)**

Einkommensverlust (Euro)

\_\_\_\_\_

---

Ausgaben Gesundheitswesen (Zuzahlung) (Euro)

\_\_\_\_\_

---

Übernachungskosten (Hotel, Transportkosten etc.) (Euro)

\_\_\_\_\_

---

Sonstige Kosten (Euro)

\_\_\_\_\_

---

Vielen Dank für Ihre Zeit und Ihre Mithilfe.

Gibt es noch etwas, das Sie uns Mitteilen wollen ? Gerne können Sie Feedback sonstige Kommentare verwenden auf dieser Seite vermerken.

Bitte beachten Sie, dass wir Ihnen auf diese Kommentare nicht antworten können. Bei Rückfragen können Sie uns telefonisch erreichen unter: 06221 522-1890 oder per E-Mail unter: [covidsurvey@rhein-neckar-kreis.de](mailto:covidsurvey@rhein-neckar-kreis.de)

## Description of variables assessed in questionnaire

| Variable                       | Type               | Definition                                                                                     |
|--------------------------------|--------------------|------------------------------------------------------------------------------------------------|
| Birth month                    | Continuous         | 01-12 (MM)                                                                                     |
| Birth year                     | Continuous         | 4-digit number (YYYY)                                                                          |
| Sex                            | Binary/Categorical | Male, female, other                                                                            |
| Height                         | Continuous         | In centimeter (cm)                                                                             |
| Weight                         | Continuous         | In kilogram (kg)                                                                               |
| Housing Situation              | Categorical        | Alone, in relationship with partner, other                                                     |
| Number of children <18 at home | Continuous         | Children living in same household                                                              |
| Presumed source of infection   | Categorical        | Not sure, social encounter, Work, Encounter in school, university, kindergarten, travel, other |

| Measured Symptom                  | Type        | Definition            |
|-----------------------------------|-------------|-----------------------|
| Any symptoms<br>If 1 (yes), then: | Binary      | 0: None, 1: Yes       |
| Fever                             | Continuous  | Peak temperature (°C) |
| Cough                             | Binary      | 0: None, 1: Yes       |
| Cough with sputum                 | Binary      | 0: None, 1: Yes       |
| Cough with bloody sputum          | Binary      | 0: None, 1: Yes       |
| Sore throat                       | Binary      | 0: None, 1: Yes       |
| Dyspnea                           | Binary      | 0: None, 1: Yes       |
| Myalgia                           | Binary      | 0: None, 1: Yes       |
| Fatigue                           | Binary      | 0: None, 1: Yes       |
| Headache                          | Binary      | 0: None, 1: Yes       |
| Rhinorrhea                        | Binary      | 0: None, 1: Yes       |
| Chest pain                        | Binary      | 0: None, 1: Yes       |
| Diarrhea                          | Binary      | 0: None, 1: Yes       |
| Nausea/Emesis                     | Binary      | 0: None, 1: Yes       |
| Dysgeusia                         | Binary      | 0: None, 1: Yes       |
| Other                             | Qualitative | Free text answer      |

## Description of variables assessed in questionnaire

| Treatment                      | Type       | Definition                                          |
|--------------------------------|------------|-----------------------------------------------------|
| Home isolation                 | Binary     | 0: No, 1: Yes                                       |
| Hospitalization                | Binary     | 0: No, 1: Yes<br>(Admission to hospital)            |
| Day of admission               | Continuous | Date (DD/MM/YYYY)                                   |
| Duration of hospital stay      | Continuous | Days                                                |
| ICU                            | Binary     | 0: No, 1: Yes<br>(Admission to intensive care unit) |
| Mechanical ventilation or ECMO | Binary     | 0: No, 1: Yes<br>(Requiring mechanical ventilation) |

| Risk Factor                    | Type        | Definition                                                                                                            |
|--------------------------------|-------------|-----------------------------------------------------------------------------------------------------------------------|
| COPD                           | Binary      | 0: No, 1: Yes                                                                                                         |
| Bronchial asthma               | Binary      | 0: No, 1: Yes                                                                                                         |
| Interstitial Lung Disease      | Binary      | 0: No, 1: Yes                                                                                                         |
| Nocturnal dyspnea              | Binary      | 0: No, 1: Yes                                                                                                         |
| Lung cancer                    | Binary      | 0: No, 1: Yes                                                                                                         |
| Malign cancer (excluding lung) | Binary      | 0: No, 1: Yes                                                                                                         |
| Cardiovascular disease         | Binary      | 0: No, 1: Yes                                                                                                         |
| Breakdown                      | Categorical | Coronary heart disease, Arrhythmia, Heart failure, stroke, hypertension, peripheral arterial occlusive disease, other |
| Kidney disease                 | Binary      | 0: No, 1: Yes                                                                                                         |
| Breakdown                      | Categorical | If yes, kidney failure with/without dialysis, kidney transplant, other                                                |

## Description of variables assessed in questionnaire

|                                      |                       |                                                                                      |
|--------------------------------------|-----------------------|--------------------------------------------------------------------------------------|
| Liver disease<br>Breakdown           | Binary<br>Categorical | 0: No, 1: Yes<br>If yes, hepatic steatosis,<br>cirrhosis, liver transplant,<br>other |
| Autoimmune-Disease<br>Breakdown      | Binary<br>Categorical | 0: No, 1: Yes<br>If yes, rheumatoid arthritis,<br>multiple sclerosis, other          |
| Diabetes                             | Binary                | 0: No, 1: Yes                                                                        |
| HIV                                  | Binary                | 0: No, 1: Yes                                                                        |
| Obesity                              | Continuous            | Body mass index >30 kg/m <sup>2</sup>                                                |
| Other                                | Qualitative           | Free text answer                                                                     |
| Medication                           | Qualitative           | Free text answer<br>(Name, daily dosis)                                              |
| ACE-Inhibitors                       | Binary                | 0: No, 1: Yes                                                                        |
| Sartans                              | Binary                | 0: No, 1: Yes                                                                        |
| Immunosuppressives                   | Binary                | 0: No, 1: Yes                                                                        |
| Chemotherapy                         | Binary                | 0: No, 1: Yes                                                                        |
| Drugs against<br>autoimmune diseases | Binary                | 0: No, 1: Yes                                                                        |
| NSAID                                | Binary                | 0: No, 1: Yes                                                                        |
| Smoking                              | Categorical           | Yes, former, never                                                                   |
| Pack Years                           | Continuous            | (Cigarettes per day/Pack<br>size) * Years                                            |
| Pregnancy                            | Binary                | 0: No, 1: Yes                                                                        |
